# Supplementary material for: On-off QD switch that memorizes past recovery from quenching by diazonium salts
Source: Royal Society of Chemistry journal article supplement (doi:10.1039/c003490h), 2010-01-01
Supplement: c003490h.pdf [file c003490h.pdf]

**Supporting information for**  
**On-off QD switch that memorizes past recovery from**  
**quenchings by diazonium salts**

**Marta Liras, María González-Béjar and J. C. Scaiano**

Page S2: Pictures of QD solutions after addition of compound 1

Page S3: Lifetime distribution for QD<sub>546</sub> and QD<sub>610</sub>

Page S4: Fluorescence recovery comparison for QD<sub>610</sub> under UVB and UVA illumination

Page S5: Evolution of QD<sub>546</sub> fluorescence

Page S6: Magnetic field effect

Page S7: Data for core QD<sub>558</sub>

*Pictures of QD solutions after addition of compound 1*

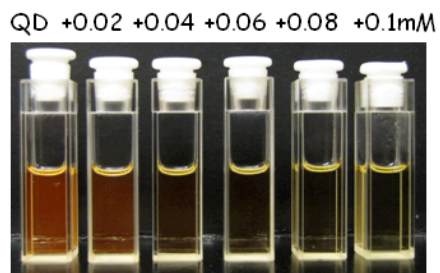

**Fig. S1.** Pictures of QD<sub>610</sub> solutions (0.5 $\mu$ M) in toluene with different amounts of **1**.

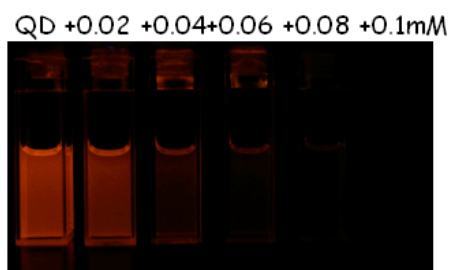

**Fig. S2** Pictures QD<sub>610</sub> solutions (0.5 $\mu$ M) in toluene with different amounts of **1** under UV irradiation.

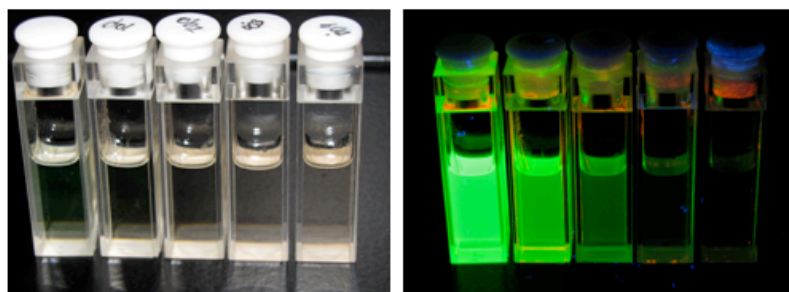

**Fig. S3.** Left: picture QD<sub>546</sub> solutions (0.5 $\mu$ M) in toluene with different amounts of **1**. Right: the same under UV irradiation.

Tito 10-5-1 5:17 PM

**Formatted:** Font:Bold, Italic, Font color: Black

### Lifetime distribution for QD<sub>610</sub>

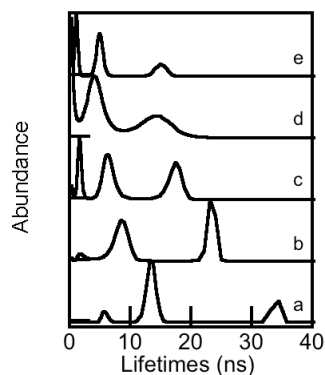

**Fig. S4.** Lifetime distribution for each decay trace for QD<sub>610</sub> in absence (a) or in presence 0.02 mM (b), 0.06 mM (c), 0.08 mM (d) and 0.1 mM (e) of **1**.

**Note:** IRF has been taken into account for our fittings and the decays have been zeroed. The experimental error in the lifetime measurements increases at higher concentrations of **1** (reaching a value of ca. 20%). The fluorescence decay profiles were fitted by three exponential functions:  $a_1 \exp(-t/\tau_1) + a_2 \exp(-t/\tau_2) + a_3 \exp(-t/\tau_3)$  [S.-C. Cui, T. Tachikawa, M. Fujitsuka and T. Majima, *J. Phys. Chem. C* **2008**, 112 (49) 19625-19634]

**Table 1.** Emission lifetimes of QD<sub>610</sub> with different amounts of **1**.

| [ <b>1</b> ] (mM) | $a_1$ (%) | $\tau_1$ (ns) | $a_2$ (%) | $\tau_2$ (ns) | $a_3$ (%) | $\tau_3$ (ns) | $\langle \tau \rangle$ (ns) |
|-------------------|-----------|---------------|-----------|---------------|-----------|---------------|-----------------------------|
| QD <sub>610</sub> | 24        | 2.12          | 68.5      | 12.4          | 7.6       | 39.35         | 11.9                        |
| <b>0.02</b>       | 39.6      | 2.93          | 54        | 11.35         | 6.6       | 36            | 9.6                         |
| <b>0.04</b>       | 65        | 2.7           | 28        | 5.8           | 7         | 21.45         | 4.9                         |
| <b>0.08</b>       | 73        | 0.8           | 24        | 5.34          | 3         | 22.8          | 2.5                         |
| <b>0.1</b>        | 80        | 1.035         | 19        | 5.889         | 1.18      | 26.35         | 2.25                        |

The average lifetime has been obtained using the following equation:  $\langle \tau \rangle = \frac{\sum a_i \tau_i}{100}$  ;

where  $\langle \tau \rangle$  is the average lifetime,  $a_i$  is the preexponential factor and  $\tau_i$  is the lifetime.

*M. Jones, J. Nedeljkovic, R. J. Ellingson, A. J. Nozik, and G. Rumbles. J. Phys. Chem. B, 2003, 107(41), 11346-11352; S.-C. Cui, T. Tachikawa, M. Fujitsuka and T. Majima, J. Phys. Chem. C. 2008, 112 (49) 19625-19634.*

*Fluorescence recovery comparison for QD<sub>610</sub> under UVB and UVA illumination*

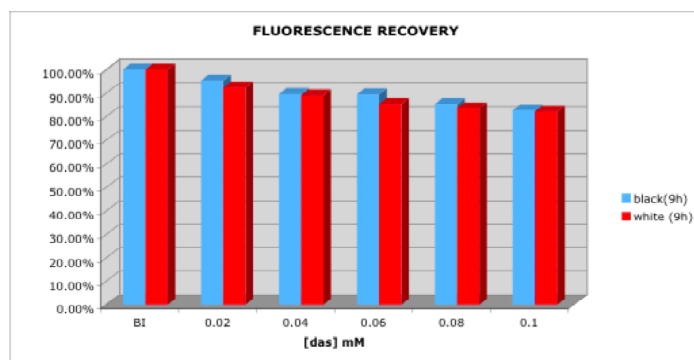

**Fig. S5.** Comparative fluorescence recovery using UVA (blue) and visible (red) lamps for QD<sub>610</sub> after a single cycle of addition and recovery.

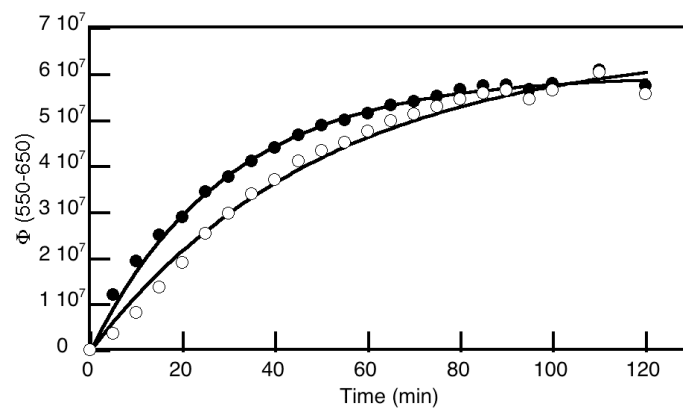

**Fig. S6.** Kinetics of the fluorescence recovery during the first irradiation with UVA light of QD<sub>610</sub> under nitrogen (filled circles) and under air (open circles).

*Evolution of QD<sub>546</sub> fluorescence*

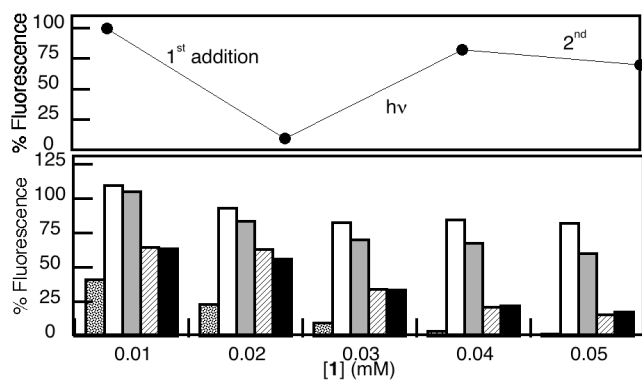

**Fig. S7.** Bottom: Evolution of QD<sub>546</sub> (0.5 μM) in toluene fluorescence with different concentrations of **1** after the first addition ▨, first irradiation □, second addition ▩, second irradiation ▤ and third addition ▦. Top: detail for QD<sub>546</sub> with 0.03 mM of **1**. Irradiated with UVA light.

### Magnetic field effect

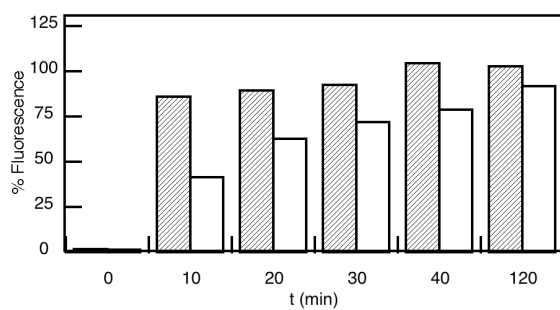

**Fig. S8.** Kinetics of fluorescence recovery using a xenon lamp as irradiation source  $\square$  and the same in presence of a magnetic field  $\blacksquare$ .

### Study for core-only QD<sub>558</sub>

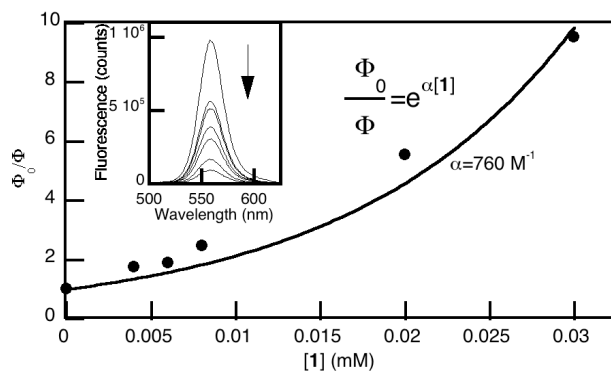

**Fig. S9.** Stern-Volmer plot of a QD<sub>558</sub> solution (0.5  $\mu$ M) in toluene. Inset: QD<sub>558</sub> emission spectra ( $\lambda_{\text{ex}} = 450$  nm) upon incremental additions of **1**: 0.004 mM, 0.006 mM, 0.008 mM, 0.02 mM and 0.03 mM.

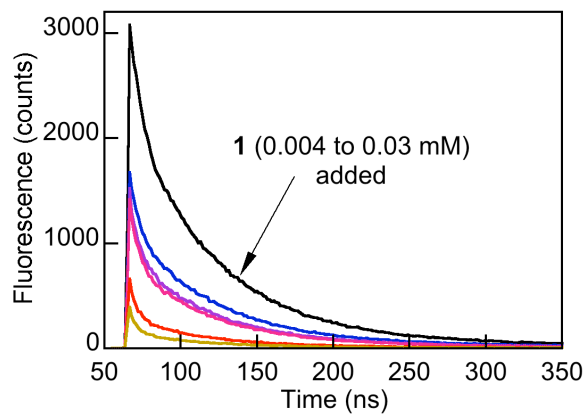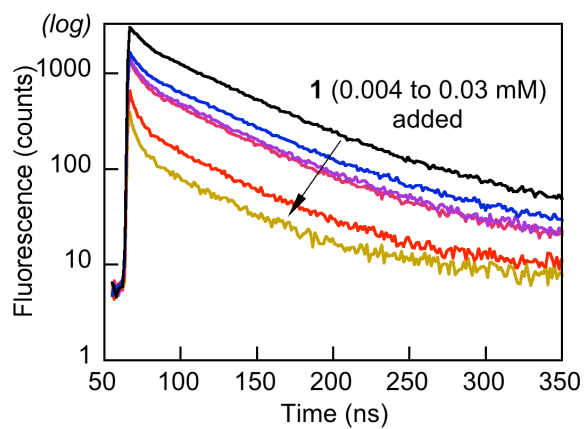

**Fig. S10.** Kinetic time profiles of QD<sub>558</sub> (0.5  $\mu$ M) in toluene with different amounts of **1**. Shown in a linear scale at the top and a log scale at the bottom.
